# Supplementary material for: Reduction of Eu3+ due to a change of the topological structure of the BO3 unit in borate glass
Source: Royal Society of Chemistry journal article supplement (doi:10.1039/c5dt03606b), 2015-01-01
Supplement: c5dt03606b1.pdf [file c5dt03606b1.pdf]

# Reducing of $\text{Eu}^{3+}$ Due to the Change of Topological Structure of $\text{BO}_3$ Unit in Borate Glass

Su Zhang,<sup>a</sup> Ran Pang,<sup>a</sup> Da Li,<sup>a</sup> Jipeng Fu,<sup>a,b</sup> Yonglei Jia,<sup>a,b</sup> Haifeng Li,<sup>a,b</sup> Wenzhi Sun,<sup>a,b</sup> Lihong Jiang,<sup>\*,a</sup> and Chengyu Li<sup>\*,a</sup>

<sup>a</sup>State Key Laboratory of Rare Earth Resources Utilization, Changchun Institute of Applied Chemistry, Chinese Academy of Sciences, Changchun 130022, P. R. China

<sup>b</sup>University of Chinese Academy of Sciences, Beijing 100049, P. R. China

## 1. Experimental

The composition of  $\text{Eu}^{2+}$ ,  $\text{Dy}^{3+}$  co-doped strontium aluminoborate glass-ceramics was  $45\text{B}_2\text{O}_3 \cdot 25\text{Al}_2\text{O}_3 \cdot 30\text{SrCO}_3 \cdot 0.05\text{Eu}_2\text{O}_3 \cdot 0.05\text{Dy}_2\text{O}_3$  (in mol%). Reagent-grade  $\text{SrCO}_3$ ,  $\text{H}_2\text{BO}_3$ ,  $\text{Al}_2\text{O}_3$ ,  $\text{Eu}_2\text{O}_3$  and  $\text{Dy}_2\text{O}_3$  were used as starting materials. Mixed batches were melted in alumina crucible at 1500 °C for 30 min under an ambient atmosphere. The crucible was covered by a lid to lower the evaporation of  $\text{B}_2\text{O}_3$ . Then the liquid was poured onto a stainless steel plate that has been pre-heated in oven at 300°C and cooled to room temperature naturally.

XRD pattern was obtained on a Rigaku D/MAX-IIB x-ray diffractometer with  $\text{Cu K}\alpha 1$  ( $\lambda=1.5405 \text{ \AA}$ ) radiation. The measurements of photoluminescence (PL) and photoluminescence excitation (PLE) spectra were performed using a Hitachi F-7000 spectrometer equipped with a 150 W xenon lamp under a working voltage of 700 V. Fourier transform infrared (FT-IR) spectrum was measured with a BRUKER IFS66 v/s vacuum-type spectrometer with KBr pellet technique. Chromaticity coordinates and luminance were obtained with a Minolta CS-100A Chromameter. The quantum efficiency yield was analyzed with a PL quantum efficiency measurement system C9920-02 Hamamatsu Photonics, Shizuoka, Japan.

## 2. LLP Photographs of SABED

The photographs of SABED in Figure 1 were obtained with a digital camera Canon EOS-5D. Photograph in Figure 1 was taken under a Philips commercial fluorescence standard lamp (D65). The long-lasting phosphorescence image of SABED was taken when turn off the lamp. The chromaticity coordinates of the sample are  $x=0.2842$ ,  $y=0.5772$ . The luminance is  $3.53 \text{ cd}\cdot\text{m}^{-2}$ , measured after the irradiation of fluorescent lamp with a power density of  $12000 \text{ lx}$  for 20 min. The limit of light perception for naked eyes is  $0.32\times 10^{-3} \text{ cd}\cdot\text{m}^{-2}$ , which means the LLP of the sample is quite strong.

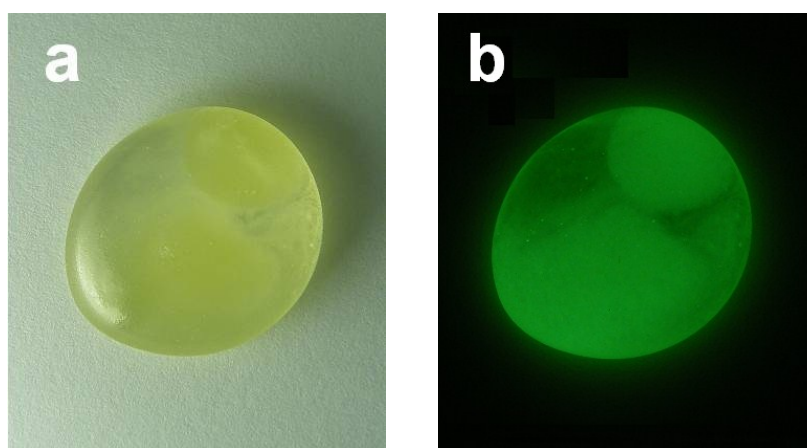

**Figure S1** The photographs of SABED (a) for the sample exciting with a Philips commercial fluorescence lamp and (b) for the long-lasting phosphorescence image obtained in dark after the irradiation.

## 3. The emission and excitation spectra of SABED

Figure 2S shows the emission spectrum of SABED excited by 254nm. The spectrum behaves in a mixed emissions consisting of the band-emission of  $\text{Eu}^{2+}$  and line-emission of  $\text{Eu}^{3+}$  and  $\text{Dy}^{3+}$ . The 515nm band emission is ascribed to  $4f^65d-4f^7(^8S_{7/2})$  transition of  $\text{Eu}^{2+}$ . The 486nm and 577nm peaked line-emissions are ascribed to the  $^4F_{9/2}-^6H_{5/2}$  and  $^4F_{9/2}-^6H_{13/2}$  transition of  $\text{Dy}^{3+}$ , and the line emission at 614 nm to the  $^5D_0-^7F_2$  transition of  $\text{Eu}^{3+}$  ions. Compared with Figure 3 in the paper,

the red emission of  $\text{Eu}^{3+}$  is increased, because when excited at 254 nm the emission of  $\text{Eu}^{3+}$  is selectively excited.

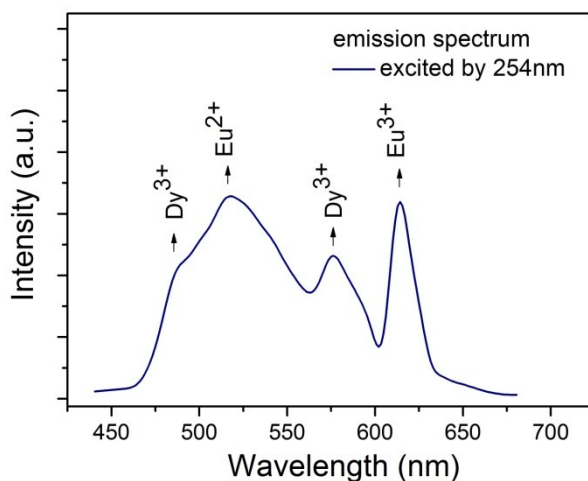

**Figure 2S** PL emission spectrum of SBAED excited by 254nm.

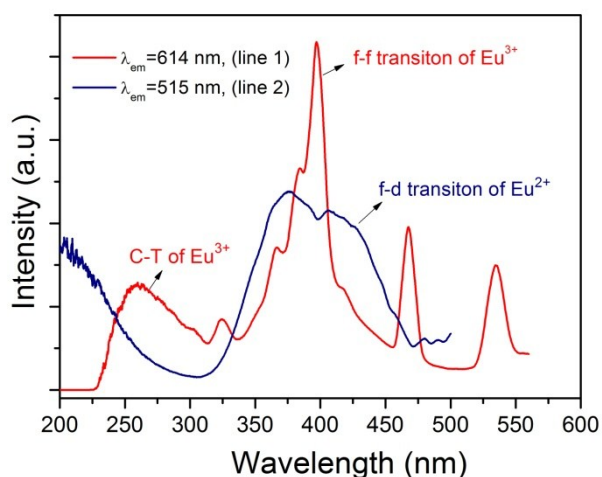

**Figure 3S** PL excitation spectrum of SBAED monitored at 614 (line 1) and 515 nm (line 2).

The PL excitation spectrum of SBAED is shown in Figure 3S. The two lines are totally different. Only a broad band was observed in line 2, which is due to the f-d transition of  $\text{Eu}^{2+}$ . Line 1, however, shows a complicate excitation peaks. The excitation band at about 255 nm is originated from the charge transfer between O and  $\text{Eu}^{3+}$ . The sharp lines in the 300–550nm range result from  $4f-4f$  transitions of  $\text{Eu}^{3+}$  in the host, and the  ${}^7F_0 \rightarrow {}^5L_6$  at 396nm and  ${}^7F_0 \rightarrow {}^5D_2$  at 466 nm are two of the strongest

absorptions. Figure 3S means that there are no energy transfer between  $\text{Eu}^{2+}$  and  $\text{Eu}^{3+}$ . Actually, the  $\text{Eu}^{2+}$  and the  $\text{Eu}^{3+}$  ions are located in the different part of the glass sample. The  $\text{Eu}^{2+}$  ion is doped in the  $\text{SrAl}_2\text{O}_4$  crystal and the  $\text{Eu}^{3+}$  ion is melted into the glass phase.

#### 4. The site occupancy of $\text{Eu}^{2+}$ in $\text{SrAl}_2\text{O}_4$

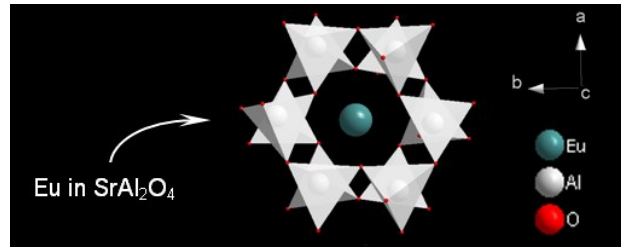

**Figure 4S** The site occupancy of  $\text{Eu}^{2+}$  in  $\text{SrAl}_2\text{O}_4$ .

The crystal phase of  $\text{SrAl}_2\text{O}_4$  adopts a stuffed tridymite monoclinic structure with space group of P21. Three pointing-up  $\text{AlO}_4$  tetrahedra alternately connect three pointing-down  $\text{AlO}_4$  tetrahedra by corner sharing to form a six-member ring. Six-member rings link to each other by a common oxygen of the pointing-up or -down tetrahedra to form the channels parallel to c-axis. These channels are further connected to form a 3-D framework by which each  $\text{Eu}^{2+}$  ion is effectively isolated and shielded from the oxidizing atmosphere and the neighboring  $\text{Eu}^{2+}$  ones.

#### 5. The mechanism of LLP in $\text{SrAl}_2\text{O}_4:\text{Eu}^{2+}, \text{Dy}^{3+}$

$\text{SrAl}_2\text{O}_4:\text{Eu}^{2+}, \text{Dy}^{3+}$  is the famous commercial LLP material. Dy is the necessary codoped ion. By doping Dy, an appropriate crystal defect is formed. And interestingly, in a well synthesized  $\text{Eu}^{2+}$  and  $\text{Dy}^{3+}$  codoped  $\text{SrAl}_2\text{O}_4$  sample, you will never find the emission of  $\text{Dy}^{3+}$ . Although there are some different mechanisms for the LLP, a common opinion is generally accepted. In the forbidden band of the  $\text{SrAl}_2\text{O}_4$  crystal, some trap levels are existent, which may originated from the crystal defect such as oxygen vacancy ( $\text{V}_\text{O}$ ), Sr vacancy ( $\text{V}_\text{Sr}$ ),  $\text{Dy}_\text{Sr}^+$ , etc. These traps can

capture and store the excitation energy, and then release it slowly at the thermal stimulation of room temperature giving the strong persistent luminescence called LLP (Chem. Mater. 2005, 17, 3904 and many other related references). LLP materials can be widely used in safety indication, detection of high-energy rays, road signs, automobile instruments, *in vivo* imaging and so on (Inorg. Chem. 2013, 52, 13875; Inorg. Chem. 2014, 53, 8638; Adv. Optical Mater. 2015 3 551; etc.).
